# Supplementary material for: Design of Ag-decorated ZnO concave nanocubes using ZIF-8 with dual functional catalytic ability for decoloring dyes
Source: Royal Society of Chemistry journal article supplement (doi:10.1039/c8ce00201k), 2018-01-01
Supplement: c8ce00201k1.pdf [file c8ce00201k1.pdf]

## **Design of Ag decorated ZnO concave nanocubes by ZIF-8 with dual functional catalytic ability for decoloring dyes**

Lei Bai <sup>a,b\*</sup>, Shengbiao Zheng,<sup>a</sup> Zirong Li,<sup>a,b</sup> Xuchun Wang,<sup>a</sup> Yu Guo,<sup>a</sup> Longqiang Ye,<sup>a</sup> and  
Jie Mao<sup>b</sup>

<sup>a</sup> College of Chemistry and Materials Engineering, Anhui Science and Technology University,  
Bengbu, Anhui, China, 233000

<sup>b</sup> Institute of Materials Chemistry, Anhui Science and Technology University, Fengyang,  
Anhui, China, 233100

Email: [baileiwj2014@163.com](mailto:baileiwj2014@163.com)

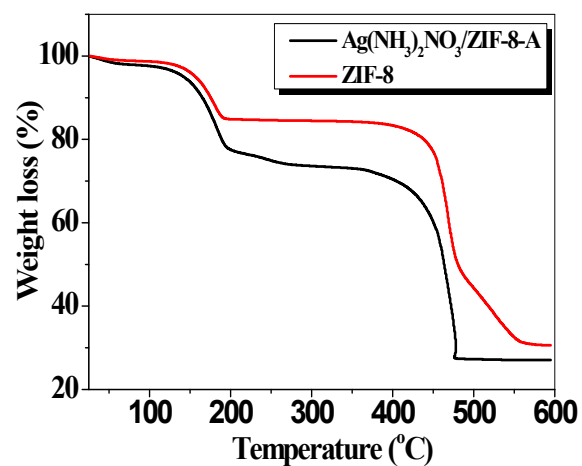

Fig. S1. TGA curves of ZIF-8 and  $\text{Ag}(\text{NH}_3)_2\text{NO}_3/\text{ZIF-8-A}$ .

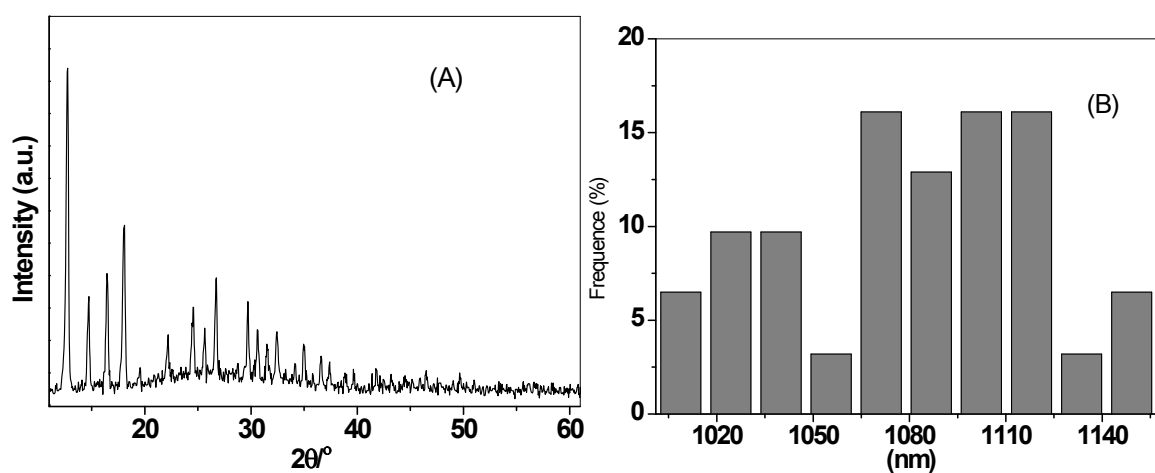

Fig. S2. XRD pattern (A) and size distribution (B) of the referenced ZIF-8 template.

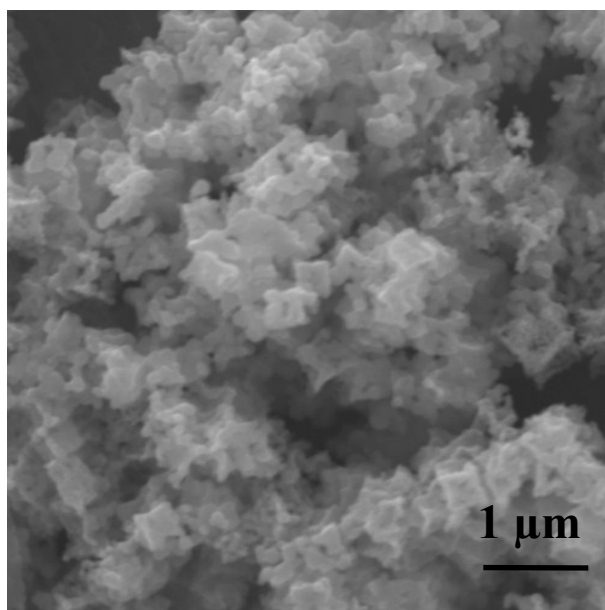

Fig. S3. SEM image of ZnO obtained at 873 K.

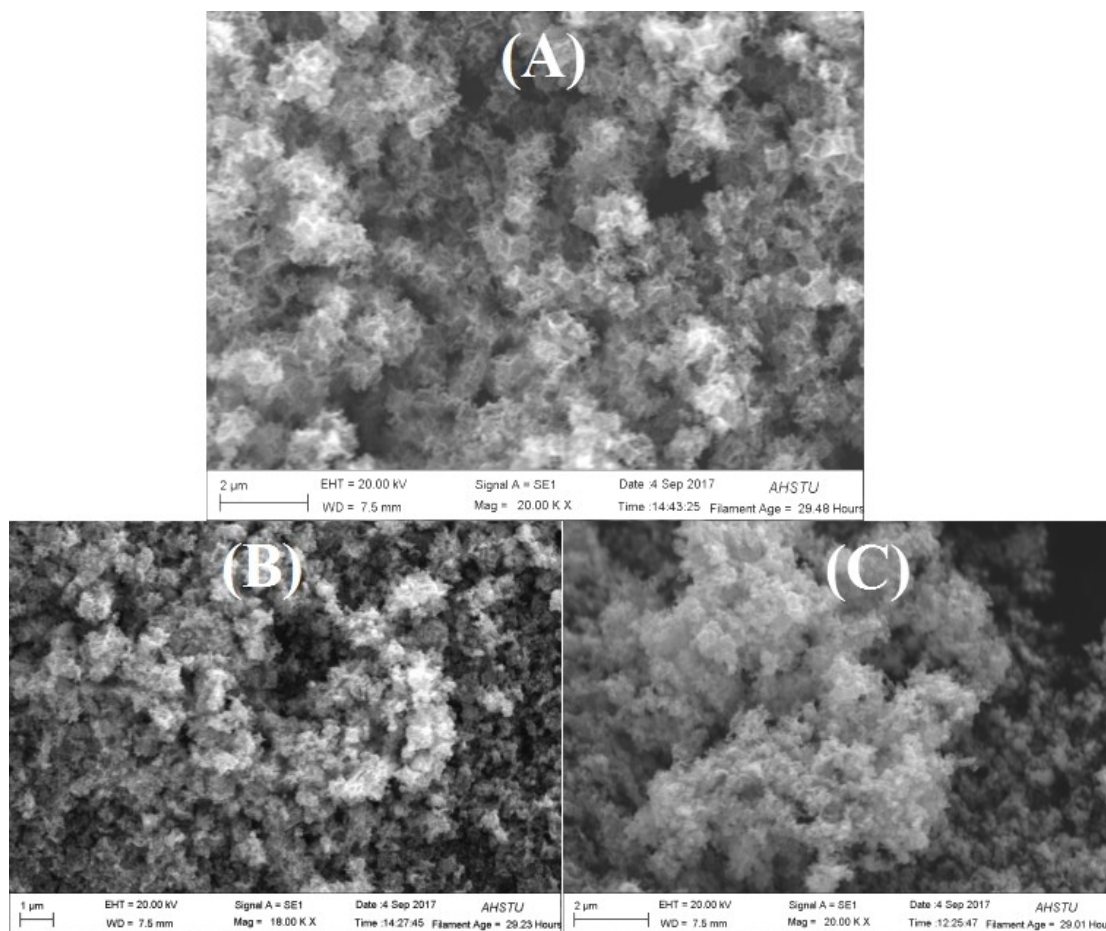

Fig. S4. SEM images of Ag/ZnO-A (A), Ag/ZnO-B (B) and Ag/ZnO-C (C).

Table S1. BET surface area of the samples before and after calcination.

| Sample                                               | $S_{\text{BET}} (\text{m}^2\text{g}^{-1})^{\text{a}}$ | $S_{\text{BET}} (\text{m}^2\text{g}^{-1})^{\text{b}}$ |
|------------------------------------------------------|-------------------------------------------------------|-------------------------------------------------------|
| ZIF-8                                                | 369.9                                                 | 14.1                                                  |
| $\text{Ag}(\text{NH}_3)_2\text{NO}_3/\text{ZIF-8-A}$ | 357.6                                                 | 12.0                                                  |
| $\text{Ag}(\text{NH}_3)_2\text{NO}_3/\text{ZIF-8-B}$ | 340.4                                                 | 9.5                                                   |
| $\text{Ag}(\text{NH}_3)_2\text{NO}_3/\text{ZIF-8-C}$ | 318.8                                                 | 7.7                                                   |

<sup>a</sup> and <sup>b</sup> stand for before and after calcination, respectively.

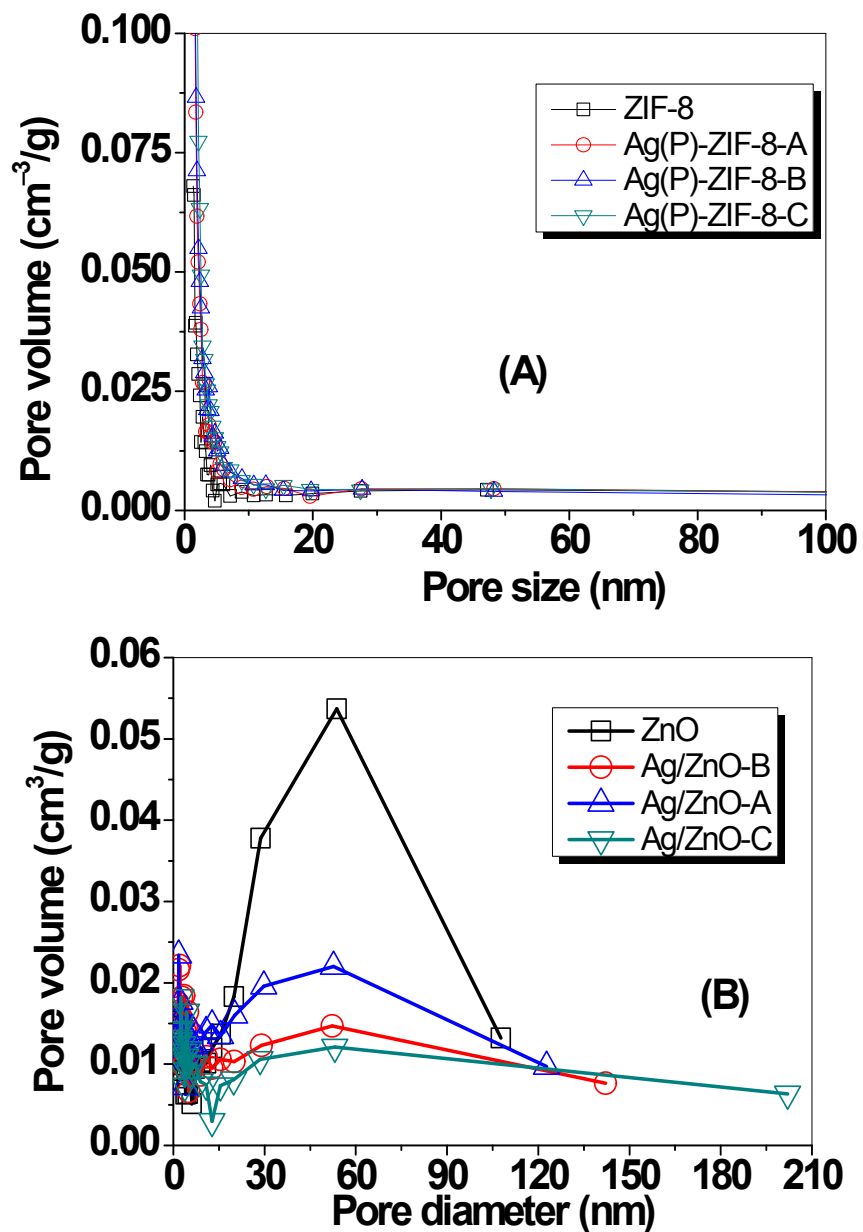

Fig. S5. Pore size distribution of the precursors before calcination (A) and calcined catalysts (B).

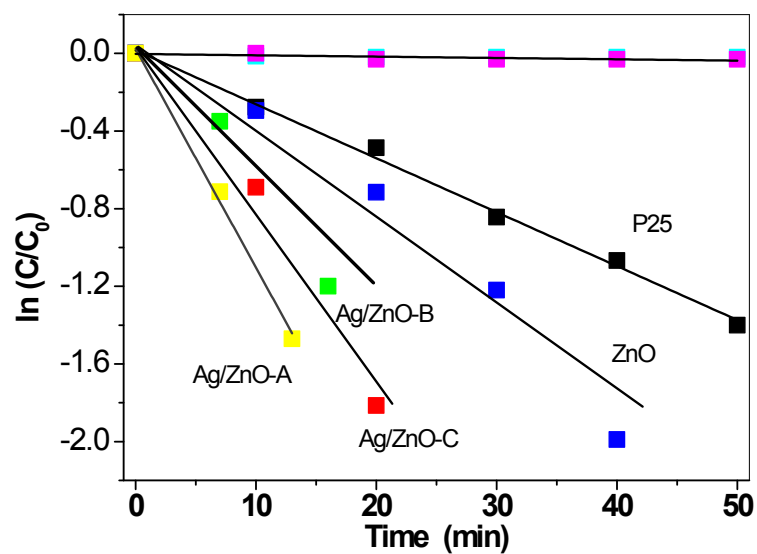

Fig. S6. Chemical kinetics study of photocatalytic degradation of MO using different catalysts.
